# Supplementary material
Source: PubMed Central journal article supplement (PMC2516233)
Supplement: 0804754105_0804754105SI.pdf [file 0804754105_0804754105SI.pdf]

# Supporting Information

Georgescu *et al.* 10.1073/pnas.0804754105

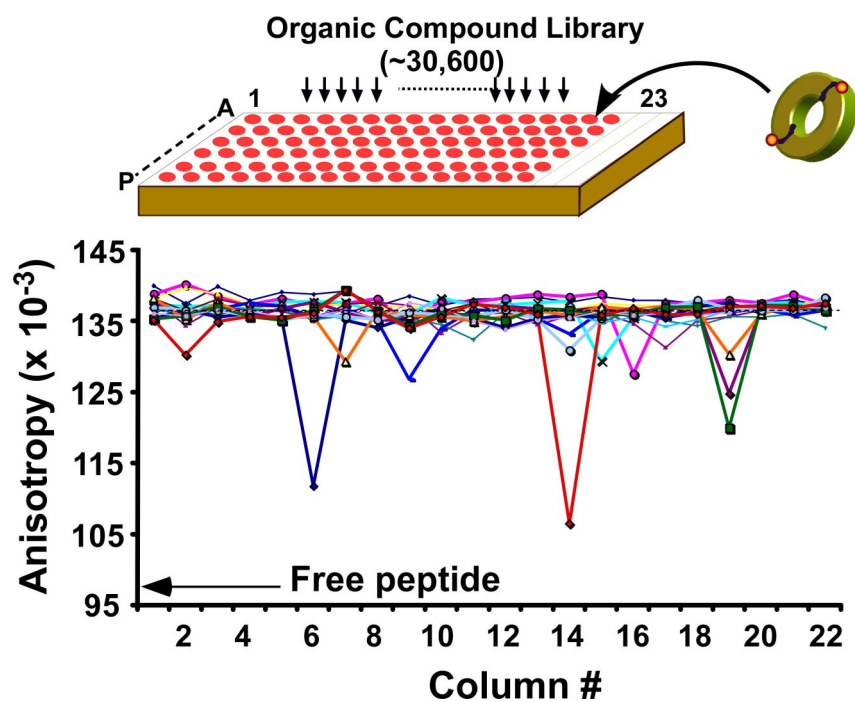

**Fig. S1.** Example of results from a 386-well plate using the peptide displacement assay. A chemical that disrupts the interaction between TAMN-labeled peptide and  $\beta$ -clamp decreases anisotropy.

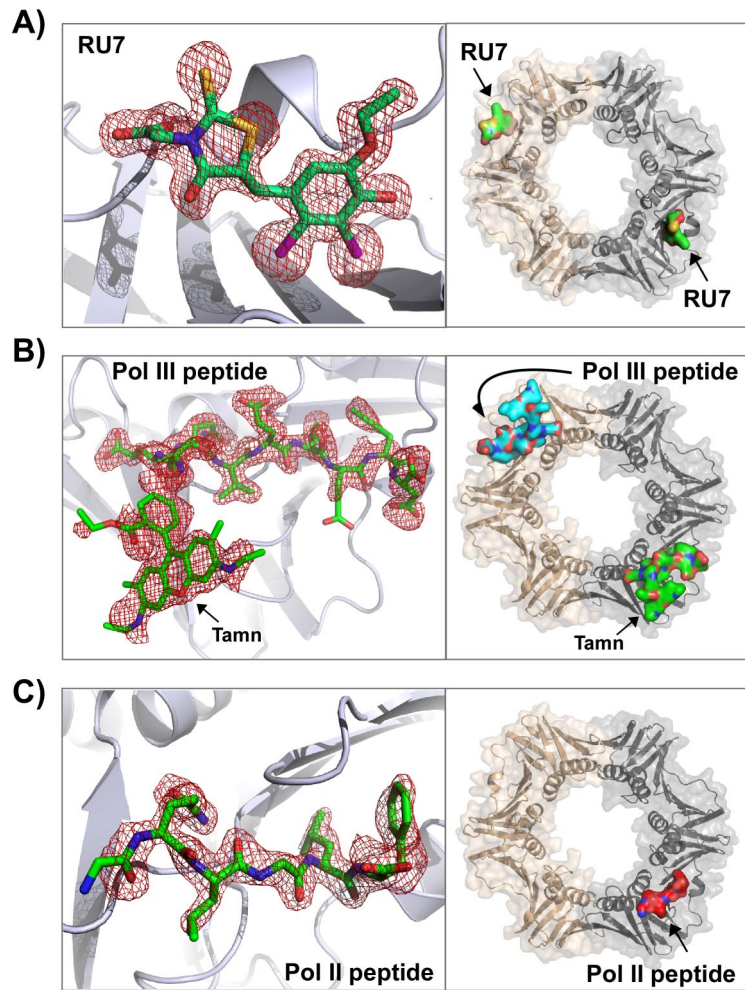

**Fig. S2.** Structure of Pol II and Pol III peptides and RU7 compound bound to the  $\beta$ -clamp. Electron density maps of RU7 (A), Pol III peptide (B), and Pol II peptide (C) contoured at  $1.6 \sigma$ ,  $1.2 \sigma$ , and  $1.2 \sigma$ , respectively. Images on the right display the positioning of RU7 and the peptides on the  $\beta$ -clamp. In the case of the Pol III peptide, the TAMN molecule is clearly visible in the electron density map and therefore was modeled into the structure.

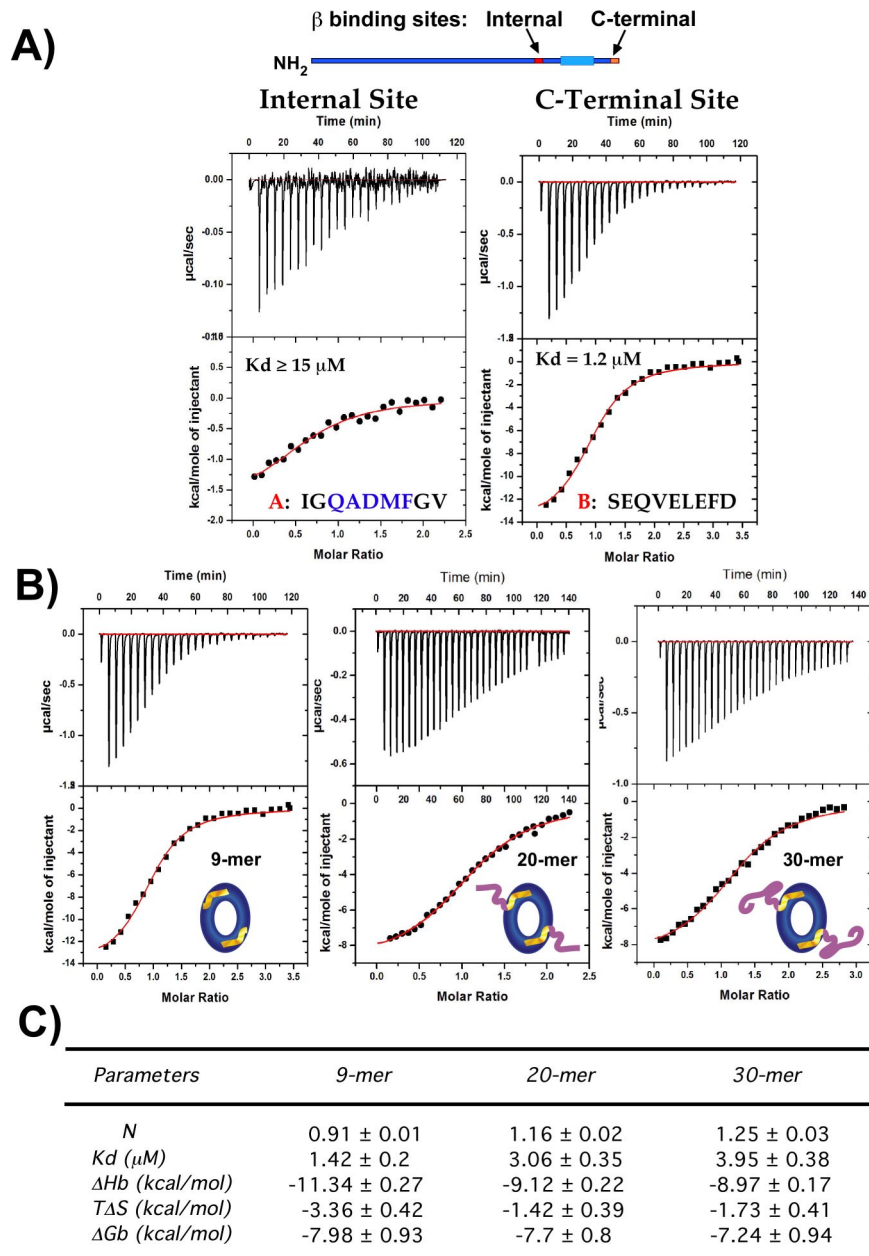

**Fig. S3.** Isothermal titration calorimetry (ITC). (A Upper) Schematic diagram of the location of  $\beta$ -clamp-binding motifs in Pol III- $\alpha$ -subunit. (Lower) Binding isotherm titrations and the best-fit curves for the  $\beta$ -clamp using 9-mer peptides corresponding to the two  $\alpha$ -sequences that bind the clamp. Data were fit to a simple binding model:  $A + B \leftrightarrow A \cdot B$ . (B) Binding isotherms for the titration of the  $\beta$ -clamp with three peptides derived from the C terminus of Pol III- $\alpha$  subunit: 9-mer, 20-mer, and 30-mer. Thermodynamic parameters calculated from these experiments are shown in C. (C) ITC was performed by using a VP-ITC microcalorimeter from MicroCal. Peptides (200–250  $\mu M$ ) were titrated in 20–30 injections (10  $\mu l$  each) into a 20  $\mu M$  solution of  $\beta$ -clamp in 1.4 ml at 25°C. Heats of dilution were obtained from separate titrations into buffer. The corrected heat released due to peptide ligand binding to  $\beta$  was measured by integrating the area of each titration peak. For the raw heat values, we assumed that full  $\beta$ -peptide complex was achieved during the titration, allowing values from these injections to be used to correct the rest of the data. In experiments with the 20-mer and 30-mer however, the shape of the curve suggests that full complex formation was not yet achieved at the final injection because of their lower affinity for  $\beta$ , and therefore the data were corrected by subtracting a stirring heat of  $-6.2$  mJ on the basis of a separate control experiment (peptide dilution in buffer).

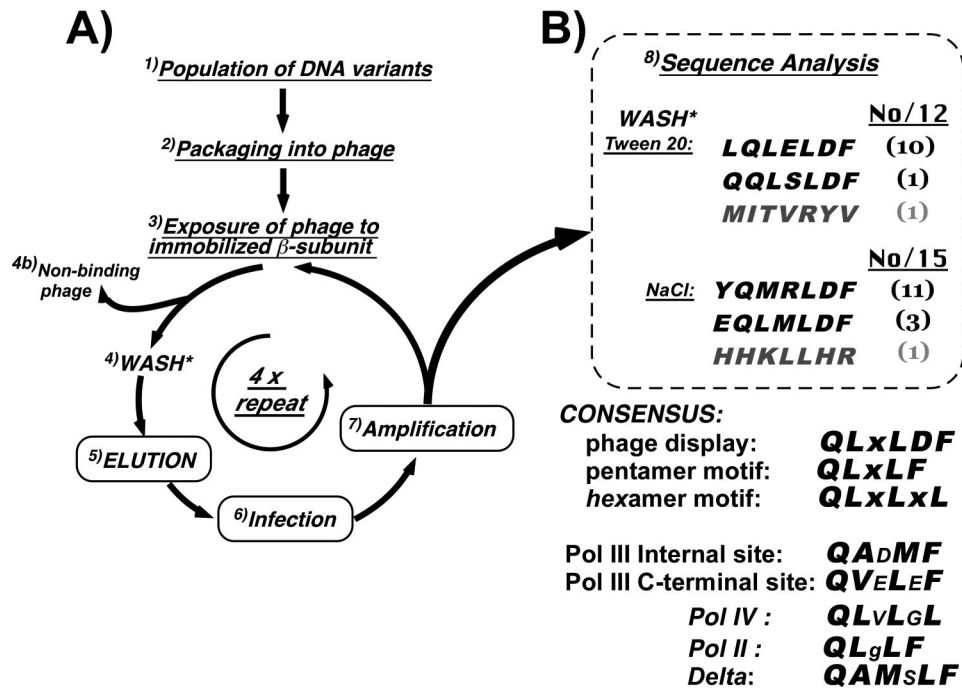

**Fig. S4.** Phage display selects a  $\beta$ -clamp-binding motif closely related to the C terminus of *E. coli* DNA Pol III- $\alpha$  subunit. The PhD 7 Phage Display Peptide Library (New England Biolabs) is based on a combinatorial library of random peptide 7-mer expressed at the N terminus of pIII. The first residue of the mature protein is the first randomized position. The peptide is followed by a short spacer (Gly-Gly-Gly-Ser) and then the wild-type pIII sequence. The library consists of  $\approx 2.8 \times 10^9$  sequences (compared with  $207 = 1.28 \times 10^9$  possible seven-residue sequences) and amplified once to yield  $\approx 70$  copies of each sequence in  $10 \mu\text{l}$  of phage. (A) Steps 1–8 of the selection procedure were performed according to the manufacturer's protocol. The "wash" step (step 4) was performed under two different conditions: Tween 20 (0.5%) or NaCl (0.5 M). (B) Sequences obtained from 27 phages are shown. The consensus sequences using sequence alignments are also shown, as are the clamp-binding motifs in Pol III, Pol IV, and  $\delta$ -subunit.

**A)**

| Gram -            |                                                                                                                                                                                                                                                                                                                                                                                                                                                                            |
|-------------------|----------------------------------------------------------------------------------------------------------------------------------------------------------------------------------------------------------------------------------------------------------------------------------------------------------------------------------------------------------------------------------------------------------------------------------------------------------------------------|
| <i>E.coli:</i>    | X <sub>151</sub> R <sub>152</sub> X <sub>2</sub> L <sub>155</sub> X <sub>16</sub> T <sub>172</sub> X <sub>2</sub> H <sub>175</sub> R <sub>176</sub> L <sub>177</sub> X <sub>64</sub> P <sub>242</sub> D <sub>243</sub> X <sub>2</sub> R <sub>246</sub> -V <sub>247</sub> X <sub>72</sub> N <sub>320</sub> X <sub>2</sub> Y <sub>323</sub> X <sub>39</sub> M <sub>362</sub> P <sub>363</sub> M <sub>364</sub> R <sub>365</sub> X <sub>1</sub>                               |
| <i>P.aer</i>      | X <sub>151</sub> R <sub>152</sub> X <sub>2</sub> L <sub>155</sub> X <sub>16</sub> T <sub>172</sub> X <sub>2</sub> H <sub>175</sub> R <sub>176</sub> L <sub>177</sub> X <sub>65</sub> P <sub>243</sub> D <sub>244</sub> X <sub>2</sub> R <sub>247</sub> -V <sub>248</sub> X <sub>72</sub> N <sub>321</sub> X <sub>2</sub> Y <sub>324</sub> X <sub>39</sub> M <sub>363</sub> P <sub>364</sub> M <sub>365</sub> R <sub>366</sub> X <sub>1</sub>                               |
| <i>Sal.typ</i>    | X <sub>151</sub> R <sub>152</sub> X <sub>2</sub> L <sub>155</sub> X <sub>16</sub> T <sub>172</sub> X <sub>2</sub> H <sub>175</sub> R <sub>176</sub> L <sub>177</sub> X <sub>64</sub> P <sub>243</sub> D <sub>244</sub> X <sub>2</sub> R <sub>246</sub> -V <sub>247</sub> X <sub>72</sub> N <sub>320</sub> X <sub>2</sub> Y <sub>323</sub> X <sub>39</sub> M <sub>362</sub> P <sub>363</sub> M <sub>364</sub> R <sub>365</sub> X <sub>1</sub>                               |
| Gram +            |                                                                                                                                                                                                                                                                                                                                                                                                                                                                            |
| <i>Strep.pyo</i>  | X <sub>158</sub> R <sub>159</sub> X <sub>2</sub> L <sub>162</sub> X <sub>17</sub> T <sub>180</sub> X <sub>2</sub> H <sub>183</sub> R <sub>184</sub> M <sub>185</sub> X <sub>64</sub> P <sub>250</sub> D <sub>251</sub> X <sub>2</sub> R <sub>254</sub> -L <sub>255</sub> X <sub>74</sub> N <sub>330</sub> X <sub>2</sub> Y <sub>333</sub> X <sub>39</sub> I <sub>372</sub> X <sub>1</sub> P <sub>374</sub> V <sub>375</sub> R <sub>376</sub> X <sub>2</sub>                |
| <i>Staph.aur</i>  | X <sub>159</sub> R <sub>160</sub> X <sub>2</sub> L <sub>163</sub> X <sub>16</sub> T <sub>180</sub> X <sub>2</sub> H <sub>183</sub> R <sub>184</sub> L <sub>185</sub> X <sub>64</sub> P <sub>250</sub> D <sub>251</sub> X <sub>2</sub> R <sub>254</sub> -L <sub>255</sub> X <sub>74</sub> N <sub>330</sub> X <sub>2</sub> Y <sub>333</sub> X <sub>39</sub> I <sub>372</sub> P <sub>373</sub> I <sub>374</sub> R <sub>375</sub> X <sub>2</sub>                               |
| <i>Strep.pneu</i> | X <sub>158</sub> R <sub>159</sub> X <sub>2</sub> L <sub>162</sub> X <sub>17</sub> T <sub>180</sub> X <sub>2</sub> H <sub>183</sub> R <sub>184</sub> L <sub>185</sub> X <sub>64</sub> P <sub>250</sub> D <sub>251</sub> X <sub>2</sub> R <sub>254</sub> -L <sub>255</sub> X <sub>74</sub> N <sub>330</sub> X <sub>2</sub> Y <sub>333</sub> X <sub>39</sub> I <sub>372</sub> X <sub>1</sub> P <sub>374</sub> V <sub>375</sub> R <sub>376</sub> X <sub>2</sub>                |
| <i>Myco.tuber</i> | X <sub>160</sub> L <sub>161</sub> X <sub>2</sub> L <sub>164</sub> X <sub>16</sub> T <sub>181</sub> X <sub>2</sub> F <sub>184</sub> R <sub>185</sub> L <sub>186</sub> X <sub>72</sub> P <sub>259</sub> K <sub>260</sub> X <sub>1</sub> R <sub>262</sub> X <sub>1</sub> L <sub>264</sub> X <sub>75</sub> N <sub>336</sub> X <sub>2</sub> Y <sub>339</sub> S <sub>356</sub> I <sub>395</sub> X <sub>1</sub> P <sub>397</sub> V <sub>398</sub> R <sub>399</sub> X <sub>3</sub> |
| <i>Entero.f</i>   | X <sub>147</sub> R <sub>148</sub> X <sub>2</sub> L <sub>151</sub> X <sub>16</sub> T <sub>168</sub> X <sub>2</sub> H <sub>171</sub> R <sub>172</sub> L <sub>173</sub> X <sub>64</sub> P <sub>238</sub> D <sub>239</sub> X <sub>2</sub> R <sub>242</sub> -L <sub>243</sub> X <sub>74</sub> N <sub>318</sub> X <sub>2</sub> Y <sub>321</sub> X <sub>39</sub> I <sub>360</sub> X <sub>1</sub> P <sub>362</sub> V <sub>363</sub> R <sub>364</sub> X <sub>2</sub>                |
| <u>consensus:</u> | ----R----L-----T----H R L-----P D/K--R--V/L---N----Y----M/L/I--P M/I/V R---                                                                                                                                                                                                                                                                                                                                                                                                |

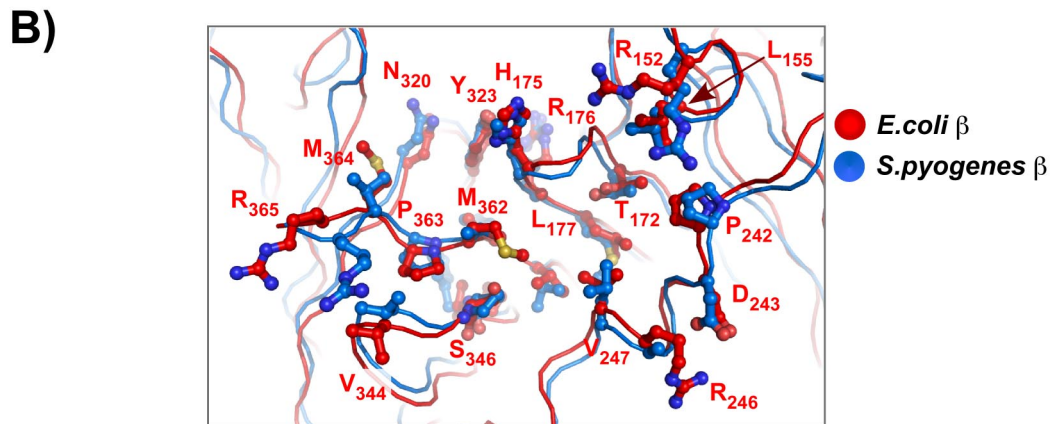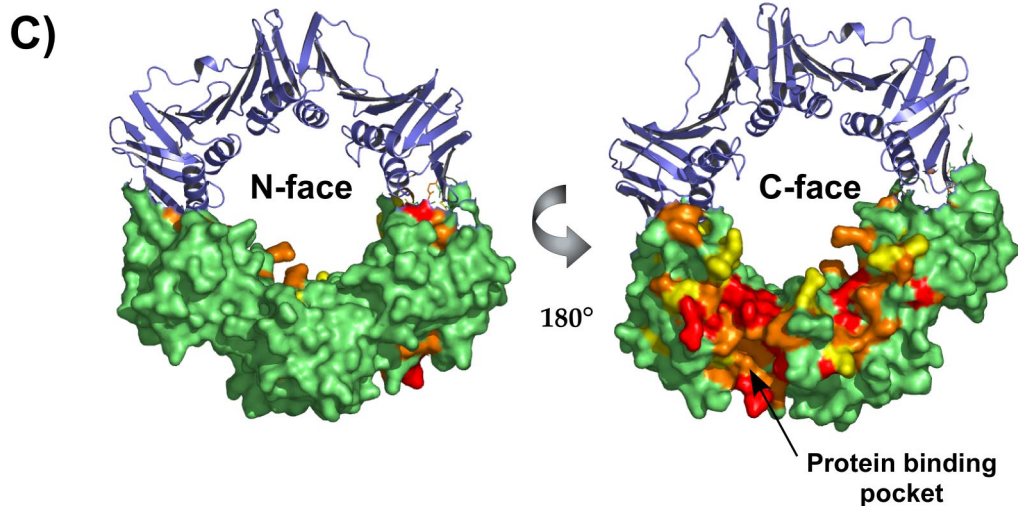

**Fig. S5.** A consensus sequence for a peptide-binding pocket in bacterial clamps. (A) Alignment of  $\beta$ -clamp residues in the clamp pocket of selected Gram-negative and Gram-positive bacteria. The consensus motif for the  $\beta$ -clamp pocket is highlighted. Residues that interact using peptide backbone atoms are omitted from the alignment (S346, V344, and L366). (B) Structural alignment of the hydrophobic pocket residues of *S. pyogenes* (blue) (PDB ID code 2AZT; Argiriadi *et al.*) and *E. coli* (red)  $\beta$ -clamps give a rmsd of 0.36 Å. *E. coli* clamp residues are numbered. (C) Surface representation of N- (left) and C- (right) faces of the  $\beta$ -clamp colored according to sequence conservation in an alignment of 42 bacterial subunits; scale runs from red (90% conservation) to yellow (50% conservation).

1. Argiriadi MA, Goedken ER, Bruck I, O'Donnell M, Kuriyan J (2006) Crystal structure of a DNA polymerase sliding clamp from a Gram-positive bacterium. *BMC Struct Biol* 6:2.

**Table S1. Crystallographic data and refinement statistics for *E. coli*  $\beta$  bound to Pol III 9-mer peptide and for *E. coli*  $\beta$  bound to compound RU7**

| Characteristics                    | Pol III 9-mer (SEQVELEFD) | Pol II 10-mer (TLMTGQLGLF) | RU-7             |
|------------------------------------|---------------------------|----------------------------|------------------|
| Space group                        | P3(2)                     | P1                         | P1               |
| Cell a/b/c, Å                      | 65.8/65.8/209.5           | 40.1/69.9/73.1             | 35.7/79.4/80.5   |
| $\alpha / \beta / \gamma$ , °      | 90.0/90.0/120.0           | 112.9/91.1/99.3            | 110.2/100.6/99.5 |
| Resolution range, Å                | 50–1.90                   | 50–1.78                    | 50–1.52          |
| No. of reflections:                |                           |                            |                  |
| Unique                             | 74,358                    | 68,885                     | 96,917           |
| Total                              | 148,848                   | 162,724                    | 241,724          |
| Mosaicity:                         | 0.89                      | 0.42                       | 0.25             |
| Completeness, %                    | 92.5 (91.3)               | 94.3 (73.6)                | 91.4 (76.1)      |
| $R_{\text{sym}}$                   | 0.040 (0.316)             | 0.058 (0.380)              | 0.056 (0.380)    |
| Mean $I/\sigma$                    | 8.5                       | 11.3                       | 10.9             |
| Final model statistics:            |                           |                            |                  |
| Resolution range, Å                | 44.14–2.00                | 33.35–1.90                 | 34.21–1.64       |
| R-factor, reflections              | 22.3                      | 22.8                       | 22.5             |
| $R_{\text{free}}$ , reflections    | 26.3                      | 26.1                       | 26.5             |
| No. of atoms                       | 6,506                     | 6,239                      | 6,401            |
| Protein                            | 5,688                     | 5,688                      | 5,688            |
| TAMN-peptide/compound              | 220                       | 45                         | 48               |
| PEG                                | 35                        |                            |                  |
| Water                              | 563                       | 468                        | 843              |
| Rmsd from ideal geometry           |                           |                            |                  |
| Bond lengths, Å                    | 0.0055                    | 0.0057                     | 0.0057           |
| Bond angles, °                     | 1.26                      | 1.24                       | 1.24             |
| B-factor, Å <sup>2</sup>           | 59.32                     | 56.48                      | 50.72            |
| Ramachandran plot statistics, %*   |                           |                            |                  |
| Resolution in most favored regions | 89.8                      | 88.8                       | 90.3             |
| Additional allowed regions         | 8.8                       | 9.1                        | 9.2              |
| Generously allowed regions         | 1.1                       | 0.3                        | 0.2              |
| Resolution in disallowed regions   | 0.3                       | 1.8                        | 0.3              |

Values in parentheses are for the highest resolution shell.

\* Statistics from PROCHECK

Ref: Collaborative Computational Project No. 4 (1994). The CCP4 suite: Programs for protein crystallography. *Acta Crystallog D* 50:760–763.
